# Supplementary material for: From Nose to Brain: Un-Sensed Electrical Currents Applied in the Nose Alter Activity in Deep Brain Structures
Source: PubMed Central journal article supplement — Cereb Cortex. 2016 Oct 17;26(11):4180–91. doi: 10.1093/cercor/bhw222 (PMC5066827; doi:10.1093/cercor/bhw222), 2016-10-17
Supplement: supp_bhw222_SUPP_TABLE.pdf [file supp_bhw222_SUPP_TABLE.pdf]

|        | <b>Location</b>    | <b>Frequency of stimulation (Hz)</b> | <b>Delivered current (<math>\mu</math>A)</b> | <b>Sensation</b> |
|--------|--------------------|--------------------------------------|----------------------------------------------|------------------|
| subj 1 | middle turbinate   | 2                                    | 500                                          | EC               |
| subj 1 | middle turbinate   | 90                                   | 335                                          | EC               |
| subj 1 | middle turbinate   | 180                                  | 340                                          | EC               |
| subj 1 | septum dorsum      | 2                                    | 500                                          | EC               |
| subj 1 | septum dorsum      | 90                                   | 340                                          | EC               |
| subj 1 | septum dorsum      | 180                                  | 400                                          | EC               |
| subj 1 | superior turbinate | 90                                   | 100                                          | EC               |
| subj 1 | superior turbinate | 180                                  | 100                                          | EC               |
| subj 2 | middle turbinate   | 2                                    | 220                                          | Tingling at ref  |
| subj 2 | middle turbinate   | 10                                   | 200                                          | Tingling at ref  |
| subj 2 | middle turbinate   | 70                                   | 210                                          | Tingling at ref  |
| subj 2 | middle turbinate   | 130                                  | 200                                          | Tingling at ref  |
| subj 2 | middle turbinate   | 180                                  | 200                                          | Tingling at ref  |
| subj 2 | olfactory cleft    | 2                                    | 180                                          | EC               |
| subj 2 | olfactory cleft    | 90                                   | 60                                           | EC               |
| subj 2 | olfactory cleft    | 180                                  | 50                                           | EC               |
| subj 2 | superior turbinate | 2                                    | 420                                          | Tingling at ref  |
| subj 2 | superior turbinate | 90                                   | 200                                          | EC               |
| subj 2 | superior turbinate | 180                                  | 230                                          | EC + pinpricks   |
| subj 3 | middle turbinate   | 2                                    | 400                                          | pinpricks        |
| subj 3 | middle turbinate   | 90                                   | 120                                          | pinpricks        |
| subj 3 | middle turbinate   | 180                                  | 120                                          | pinpricks        |
| subj 3 | superior turbinate | 2                                    | 300                                          | Tingling at ref  |
| subj 3 | superior turbinate | 90                                   | 100                                          | Tingling at ref  |
| subj 3 | superior turbinate | 180                                  | 140                                          | Tingling at ref  |
| subj 4 | middle turbinate   | 2                                    | 650                                          | EC               |
| subj 4 | middle turbinate   | 90                                   | 530                                          | EC               |
| subj 4 | middle turbinate   | 180                                  | 550                                          | EC               |
| subj 4 | olfactory cleft    | 2                                    | 50                                           | EC               |
| subj 4 | olfactory cleft    | 90                                   | 50                                           | EC               |
| subj 4 | olfactory cleft    | 180                                  | 50                                           | EC               |
| subj 4 | septum dorsum      | 2                                    | 315                                          | EC               |
| subj 4 | septum dorsum      | 90                                   | 230                                          | EC               |
| subj 4 | septum dorsum      | 180                                  | 160                                          | EC               |
| subj 5 | middle turbinate   | 2                                    | 300                                          | EC               |
| subj 5 | middle turbinate   | 180                                  | 360                                          | EC               |
| subj 5 | septum dorsum      | 90                                   | 230                                          | Cooling + EC     |
| subj 5 | septum dorsum      | 180                                  | 230                                          | EC               |
| subj 5 | superior turbinate | 2                                    | 100                                          | pinpricks        |
| subj 5 | superior turbinate | 90                                   | 100                                          | pinpricks        |
| subj 5 | superior turbinate | 180                                  | 80                                           | pinpricks        |
| subj 6 | middle turbinate   | 2                                    | 200                                          | EC               |
| subj 6 | olfactory cleft    | 2                                    | 160                                          | EC               |
| subj 6 | superior turbinate | 2                                    | 205                                          | EC               |
| subj 6 | superior turbinate | 90                                   | 100                                          | EC               |
| subj 6 | superior turbinate | 180                                  | 110                                          | EC               |

|              | <b>Location</b>  | <b>Frequency of stimulation (Hz)</b> | <b>Delivered current (<math>\mu</math>A)</b> | <b>Sensation</b> |
|--------------|------------------|--------------------------------------|----------------------------------------------|------------------|
| subj 7 (I)   | middle turbinate | 2                                    | 280                                          | Tingling at ref  |
| subj 7 (I)   | middle turbinate | 10                                   | 280                                          | Tingling at ref  |
| subj 7 (I)   | middle turbinate | 70                                   | 240                                          | Tingling at ref  |
| subj 7 (I)   | middle turbinate | 130                                  | 250                                          | Tingling at ref  |
| subj 7 (II)  | middle turbinate | burst                                | 620                                          | Tingling at ref  |
| subj 7 (II)  | middle turbinate | 2                                    | 610                                          | Tingling at ref  |
| subj 7 (II)  | middle turbinate | 10                                   | 190                                          | phosphenes       |
| subj 7 (II)  | middle turbinate | 70                                   | 480                                          | Tingling at ref  |
| subj 7 (II)  | middle turbinate | 180                                  | 350                                          | Tingling at ref  |
| subj 8 (I)   | middle turbinate | 2                                    | 360                                          | Tingling at ref  |
| subj 8 (I)   | middle turbinate | 10                                   | 90                                           | phosphenes       |
| subj 8 (I)   | middle turbinate | 70                                   | 300                                          | Tingling at ref  |
| subj 8 (I)   | middle turbinate | 90                                   | 300                                          | Tingling at ref  |
| subj 8 (I)   | middle turbinate | 130                                  | 280                                          | Tingling at ref  |
| subj 8 (II)  | middle turbinate | 2                                    | 400                                          | EC               |
| subj 8 (II)  | middle turbinate | 10                                   | 320                                          | EC               |
| subj 8 (II)  | middle turbinate | 90                                   | 300                                          | EC               |
| subj 8 (II)  | middle turbinate | 180                                  | 300                                          | EC               |
| subj 9 (I)   | middle turbinate | 2                                    | 350                                          | pinpricks        |
| subj 9 (I)   | middle turbinate | 10                                   | 150                                          | phosphenes       |
| subj 9 (I)   | middle turbinate | 70                                   | 250                                          | pinpricks        |
| subj 9 (I)   | middle turbinate | 90                                   | 250                                          | pinpricks        |
| subj 9 (II)  | middle turbinate | 2                                    | 400                                          | EC               |
| subj 9 (II)  | middle turbinate | 10                                   | 150                                          | phosphenes       |
| subj 9 (II)  | middle turbinate | 70                                   | 350                                          | EC               |
| subj 9 (II)  | middle turbinate | 180                                  | 350                                          | EC               |
| subj 10 (I)  | middle turbinate | 2                                    | 500                                          | nan              |
| subj 10 (I)  | middle turbinate | 10                                   | 130                                          | phosphenes       |
| subj 10 (I)  | middle turbinate | 70                                   | 200                                          | Tingling at ref  |
| subj 10 (I)  | middle turbinate | 90                                   | 200                                          | Tingling at ref  |
| subj 10 (II) | middle turbinate | 2                                    | 550                                          | nan              |
| subj 10 (II) | middle turbinate | 10                                   | 90                                           | phosphenes       |
| subj 10 (II) | middle turbinate | 70                                   | 520                                          | nan              |
| subj 10 (II) | middle turbinate | 90                                   | 520                                          | nan              |
| subj 11 (I)  | middle turbinate | 2                                    | 280                                          | EC               |
| subj 11 (I)  | middle turbinate | 70                                   | 300                                          | EC               |
| subj 11 (I)  | middle turbinate | 130                                  | 230                                          | EC               |
| subj 11 (I)  | middle turbinate | 180                                  | 180                                          | EC               |
| subj 11 (II) | middle turbinate | 2                                    | 280                                          | Tingling at ref  |
| subj 11 (II) | middle turbinate | 10                                   | 120                                          | phosphenes       |
| subj 11 (II) | middle turbinate | 70                                   | 115                                          | Tingling at ref  |
| subj 11 (II) | middle turbinate | 180                                  | 80                                           | Tingling at ref  |
| subj 12 (I)  | middle turbinate | 2                                    | 400                                          | EC               |
| subj 12 (I)  | middle turbinate | 10                                   | 150                                          | phosphenes       |
| subj 12 (I)  | middle turbinate | 70                                   | 250                                          | EC               |
| subj 12 (I)  | middle turbinate | 130                                  | 250                                          | EC               |

|              | <b>Location</b>  | <b>Frequency of stimulation (Hz)</b> | <b>Delivered current (<math>\mu</math>A)</b> | <b>Sensation</b> |
|--------------|------------------|--------------------------------------|----------------------------------------------|------------------|
| subj 12 (II) | middle turbinate | 2                                    | 500                                          | EC               |
| subj 12 (II) | middle turbinate | 10                                   | 250                                          | phosphenes       |
| subj 12 (II) | middle turbinate | 70                                   | 410                                          | EC               |
| subj 12 (II) | middle turbinate | 130                                  | 410                                          | EC               |
| subj 13 (I)  | middle turbinate | 10                                   | 160                                          | phosphenes       |
| subj 13 (I)  | middle turbinate | 70                                   | 370                                          | EC               |
| subj 13 (I)  | middle turbinate | 130                                  | 360                                          | EC               |
| subj 13 (I)  | middle turbinate | 180                                  | 350                                          | EC               |
| subj 13 (I)  | middle turbinate | 90                                   | 320                                          | EC               |
| subj 13 (II) | middle turbinate | burst                                | 700                                          | nan              |
| subj 13 (II) | middle turbinate | 10                                   | 135                                          | phosphenes       |
| subj 14 (I)  | middle turbinate | burst                                | 780                                          | nan              |
| subj 14 (I)  | middle turbinate | 10                                   | 360                                          | phosphenes       |
| subj 14 (I)  | middle turbinate | 2                                    | 560                                          | EC               |
| subj 14 (I)  | middle turbinate | 90                                   | 640                                          | EC               |
| subj 14 (I)  | middle turbinate | 130                                  | 660                                          | nan              |
| subj 14 (I)  | middle turbinate | 180                                  | 720                                          | EC               |
| subj 14 (II) | middle turbinate | 2                                    | 400                                          | EC               |
| subj 14 (II) | middle turbinate | 10                                   | 140                                          | phosphenes       |
| subj 14 (II) | middle turbinate | 70                                   | 400                                          | EC               |
| subj 15 (I)  | middle turbinate | 2                                    | 300                                          | Tingling at ref  |
| subj 15 (I)  | middle turbinate | 90                                   | 340                                          | Tingling at ref  |
| subj 15 (I)  | middle turbinate | 180                                  | 340                                          | Tingling at ref  |
| subj 15 (II) | middle turbinate | 2                                    | 300                                          | Tingling at ref  |
| subj 15 (II) | middle turbinate | 90                                   | 375                                          | Tingling at ref  |
| subj 15 (II) | middle turbinate | 180                                  | 370                                          | Tingling at ref  |
| subj 16 (I)  | middle turbinate | burst                                | 710                                          | nan              |
| subj 16 (I)  | middle turbinate | 2                                    | 700                                          | nan              |
| subj 16 (I)  | middle turbinate | 10                                   | 180                                          | phosphenes       |
| subj 16 (I)  | middle turbinate | 70                                   | 710                                          | nan              |
| subj 16 (I)  | middle turbinate | 90                                   | 720                                          | nan              |
| subj 16 (I)  | middle turbinate | 130                                  | 740                                          | nan              |
| subj 16 (I)  | middle turbinate | 180                                  | 780                                          | nan              |
| subj 16 (II) | middle turbinate | 2                                    | 680                                          | nan              |
| subj 16 (II) | middle turbinate | 10                                   | 200                                          | phosphenes       |
| subj 17 (I)  | middle turbinate | 2                                    | 140                                          | Tingling at ref  |
| subj 17 (I)  | middle turbinate | 70                                   | 100                                          | Tingling at ref  |
| subj 17 (I)  | middle turbinate | 10                                   | 55                                           | phosphenes       |
| subj 17 (I)  | middle turbinate | 90                                   | 130                                          | Tingling at ref  |
| subj 17 (I)  | middle turbinate | 130                                  | 125                                          | Tingling at ref  |
| subj 17 (I)  | middle turbinate | 180                                  | 130                                          | Tingling at ref  |
| subj 17 (II) | middle turbinate | 2                                    | 110                                          | Tingling at ref  |
| subj 17 (II) | middle turbinate | 10                                   | 90                                           | phosphenes       |
| subj 17 (II) | middle turbinate | 70                                   | 200                                          | Tingling at ref  |
| subj 17 (II) | middle turbinate | 90                                   | 220                                          | Tingling at ref  |

|              | <b>Location</b>  | <b>Frequency of stimulation (Hz)</b> | <b>Delivered current (<math>\mu</math>A)</b> | <b>Sensation</b> |
|--------------|------------------|--------------------------------------|----------------------------------------------|------------------|
| subj 17 (II) | middle turbinate | 130                                  | 200                                          | Tingling at ref  |
| subj 17 (II) | middle turbinate | 180                                  | 180                                          | Tingling at ref  |
| subj 18 (I)  | middle turbinate | 2                                    | 60                                           | Tingling at ref  |
| subj 18 (I)  | middle turbinate | 10                                   | 60                                           | Tingling at ref  |
| subj 18 (I)  | middle turbinate | 90                                   | 90                                           | Tingling at ref  |
| subj 18 (I)  | middle turbinate | 70                                   | 60                                           | Tingling at ref  |
| subj 18 (I)  | middle turbinate | 130                                  | 100                                          | Tingling at ref  |
| subj 18 (I)  | middle turbinate | 180                                  | 70                                           | Tingling at ref  |
| subj 18 (II) | middle turbinate | 10                                   | 110                                          | phosphenes       |
| subj 18 (II) | middle turbinate | 70                                   | 160                                          | Tingling at ref  |
| subj 18 (II) | middle turbinate | 90                                   | 160                                          | Tingling at ref  |
| subj 18 (II) | middle turbinate | 130                                  | 150                                          | Tingling at ref  |
| subj 18 (II) | middle turbinate | 180                                  | 150                                          | Tingling at ref  |
| subj 19 (I)  | middle turbinate | 2                                    | 140                                          | EC               |
| subj 19 (I)  | middle turbinate | 10                                   | 150                                          | EC               |
| subj 19 (I)  | middle turbinate | 70                                   | 150                                          | EC               |
| subj 19 (I)  | middle turbinate | 90                                   | 150                                          | EC               |
| subj 19 (I)  | middle turbinate | 130                                  | 160                                          | EC               |
| subj 19 (I)  | middle turbinate | 180                                  | 150                                          | EC               |
| subj 19 (II) | middle turbinate | 10                                   | 200                                          | phosphenes + EC  |
| subj 19 (II) | middle turbinate | 70                                   | 200                                          | EC               |
| subj 19 (II) | middle turbinate | 90                                   | 200                                          | EC               |
| subj 20 (I)  | middle turbinate | 10                                   | 60                                           | phosphenes +EC   |
| subj 20 (I)  | middle turbinate | 70                                   | 80                                           | EC               |
| subj 20 (I)  | middle turbinate | 130                                  | 70                                           | EC               |
| subj 20 (I)  | middle turbinate | 180                                  | 70                                           | EC               |
| subj 20 (II) | middle turbinate | 2                                    | 140                                          | EC               |
| subj 20 (II) | middle turbinate | 10                                   | 120                                          | phosphenes       |
| subj 20 (II) | middle turbinate | 70                                   | 130                                          | EC               |
| subj 20 (II) | middle turbinate | 130                                  | 130                                          | EC               |
| subj 21      | middle turbinate | 2                                    | 350                                          | EC               |
| subj 21      | middle turbinate | 10                                   | 400                                          | EC               |
| subj 21      | middle turbinate | 70                                   | 400                                          | EC               |
| subj 22      | middle turbinate | 2                                    | 325                                          | Tingling at ref  |
| subj 22      | middle turbinate | 10                                   | 300                                          | Tingling at ref  |
| subj 22      | middle turbinate | 70                                   | 300                                          | Tingling at ref  |
| subj 22      | middle turbinate | 130                                  | 210                                          | Tingling at ref  |
| subj 23      | middle turbinate | 2                                    | 600                                          | pinpricks        |
| subj 23      | middle turbinate | 10                                   | 340                                          | phosphenes       |
| subj 23      | middle turbinate | 70                                   | 250                                          | pinpricks        |
| subj 23      | middle turbinate | 130                                  | 200                                          | pinpricks        |
| subj 24      | middle turbinate | burst                                | 400                                          | pinpricks        |
| subj 24      | middle turbinate | 2                                    | 200                                          | pinpricks        |
| subj 25      | middle turbinate | 90                                   | 450                                          | Tingling at ref  |
| subj 25      | middle turbinate | 130                                  | 450                                          | Tingling at ref  |
| subj 25      | middle turbinate | 180                                  | 500                                          | Tingling at ref  |

|         | <b>Location</b>  | <b>Frequency of stimulation (Hz)</b> | <b>Delivered current (<math>\mu</math>A)</b> | <b>Sensation</b> |
|---------|------------------|--------------------------------------|----------------------------------------------|------------------|
| subj 26 | middle turbinate | burst                                | 700                                          | Tingling at ref  |
| subj 26 | middle turbinate | 90                                   | 620                                          | Tingling at ref  |
| subj 26 | middle turbinate | 180                                  | 660                                          | Tingling at ref  |
| subj 27 | middle turbinate | burst                                | 400                                          | Tingling at ref  |
| subj 27 | middle turbinate | 2                                    | 220                                          | Tingling at ref  |
| subj 27 | middle turbinate | 70                                   | 260                                          | Tingling at ref  |
| subj 27 | middle turbinate | 90                                   | 250                                          | Tingling at ref  |
| subj 27 | middle turbinate | 130                                  | 240                                          | Tingling at ref  |
| subj 27 | middle turbinate | 180                                  | 230                                          | Tingling at ref  |
| subj 28 | middle turbinate | 70                                   | 230                                          | EC               |
| subj 28 | middle turbinate | 90                                   | 220                                          | EC               |
| subj 28 | middle turbinate | 130                                  | 220                                          | EC               |
| subj 28 | middle turbinate | 180                                  | 220                                          | EC               |
| subj 29 | middle turbinate | 70                                   | 620                                          | EC               |
| subj 29 | middle turbinate | 90                                   | 600                                          | EC               |
| subj 29 | middle turbinate | 130                                  | 600                                          | EC               |
| subj 29 | middle turbinate | 180                                  | 600                                          | EC               |
| subj 30 | middle turbinate | burst                                | 800                                          | EC               |
| subj 30 | middle turbinate | 70                                   | 400                                          | EC               |
| subj 30 | middle turbinate | 90                                   | 390                                          | EC               |
| subj 30 | middle turbinate | 130                                  | 380                                          | EC               |
| subj 30 | middle turbinate | 180                                  | 380                                          | EC               |
| subj 31 | middle turbinate | burst                                | 780                                          | nan              |
| subj 31 | middle turbinate | 70                                   | 600                                          | Tingling at ref  |
| subj 31 | middle turbinate | 90                                   | 600                                          | Tingling at ref  |
| subj 31 | middle turbinate | 130                                  | 610                                          | Tingling at ref  |
| subj 31 | middle turbinate | 180                                  | 600                                          | Tingling at ref  |
| subj 32 | middle turbinate | burst                                | 800                                          | nan              |
| subj 32 | middle turbinate | 2                                    | 800                                          | nan              |
| subj 32 | middle turbinate | 70                                   | 800                                          | nan              |
| subj 32 | middle turbinate | 90                                   | 760                                          | Tingling at ref  |
| subj 32 | middle turbinate | 130                                  | 800                                          | nan              |
| subj 32 | middle turbinate | 180                                  | 800                                          | nan              |
| subj 33 | middle turbinate | 70                                   | 420                                          | EC               |
| subj 33 | middle turbinate | 90                                   | 400                                          | EC               |
| subj 33 | middle turbinate | 130                                  | 400                                          | EC               |
| subj 33 | middle turbinate | 180                                  | 400                                          | EC               |
| subj 34 | middle turbinate | 2                                    | 500                                          | phosphenes       |
| subj 34 | middle turbinate | 10                                   | 400                                          | phosphenes       |
| subj 34 | middle turbinate | 70                                   | 480                                          | phosphenes       |
| subj 35 | middle turbinate | 2                                    | 320                                          | EC               |
| subj 35 | middle turbinate | 70                                   | 300                                          | EC               |
| subj 35 | middle turbinate | 90                                   | 300                                          | EC               |
| subj 35 | middle turbinate | 130                                  | 300                                          | EC               |
| subj 36 | middle turbinate | burst                                | 500                                          | EC               |
| subj 36 | middle turbinate | 2                                    | 180                                          | EC               |

|         | <b>Location</b>  | <b>Frequency of stimulation (Hz)</b> | <b>Delivered current (<math>\mu</math>A)</b> | <b>Sensation</b> |
|---------|------------------|--------------------------------------|----------------------------------------------|------------------|
| subj 36 | middle turbinate | 70                                   | 160                                          | EC               |
| subj 36 | middle turbinate | 90                                   | 160                                          | EC               |
| subj 36 | middle turbinate | 130                                  | 160                                          | EC               |
| subj 36 | middle turbinate | 180                                  | 155                                          | EC               |
| subj 37 | middle turbinate | 70                                   | 300                                          | EC               |
| subj 37 | middle turbinate | 90                                   | 300                                          | EC               |
| subj 37 | middle turbinate | 130                                  | 300                                          | EC               |
| subj 37 | middle turbinate | 180                                  | 240                                          | EC               |
| subj 38 | middle turbinate | 2                                    | 280                                          | Tingling at ref  |
| subj 38 | middle turbinate | 70                                   | 270                                          | Tingling at ref  |
| subj 38 | middle turbinate | 180                                  | 250                                          | Tingling at ref  |
| subj 39 | middle turbinate | 2                                    | 240                                          | Tingling at ref  |
| subj 39 | middle turbinate | 70                                   | 220                                          | Tingling at ref  |
| subj 39 | middle turbinate | 180                                  | 220                                          | Tingling at ref  |
| subj 40 | middle turbinate | 2                                    | 240                                          | EC               |
| subj 40 | middle turbinate | 90                                   | 240                                          | EC               |
| subj 40 | middle turbinate | 130                                  | 230                                          | EC               |
| subj 40 | middle turbinate | 180                                  | 230                                          | EC               |
| subj 41 | middle turbinate | 2                                    | 590                                          | EC               |
| subj 41 | middle turbinate | 70                                   | 540                                          | EC               |
| subj 41 | middle turbinate | 90                                   | 540                                          | EC               |
| subj 41 | middle turbinate | 130                                  | 540                                          | EC               |
| subj 41 | middle turbinate | 180                                  | 540                                          | EC               |
| subj 42 | middle turbinate | 2                                    | 100                                          | EC               |
| subj 42 | middle turbinate | 70                                   | 90                                           | EC               |
| subj 42 | middle turbinate | 90                                   | 90                                           | EC               |
| subj 43 | middle turbinate | 2                                    | 700                                          | nan              |
| subj 43 | middle turbinate | 10                                   | 450                                          | phosphenes       |
| subj 43 | middle turbinate | 70                                   | 700                                          | nan              |
| subj 44 | middle turbinate | 2                                    | 700                                          | nan              |
| subj 44 | middle turbinate | 90                                   | 720                                          | cooling          |
| subj 45 | middle turbinate | 2                                    | 240                                          | Tingling at ref  |
| subj 45 | middle turbinate | 10                                   | 110                                          | phosphenes       |
| subj 45 | middle turbinate | 70                                   | 200                                          | Tingling at ref  |
| subj 45 | middle turbinate | 130                                  | 150                                          | Tingling at ref  |
| subj 46 | middle turbinate | 70                                   | 410                                          | EC               |
| subj 46 | middle turbinate | 90                                   | 410                                          | EC               |
| subj 46 | middle turbinate | 130                                  | 400                                          | EC               |
| subj 46 | middle turbinate | 180                                  | 400                                          | EC               |
| subj 47 | middle turbinate | 2                                    | 700                                          | nan              |
| subj 47 | middle turbinate | 10                                   | 400                                          | phosphenes       |
| subj 47 | middle turbinate | 70                                   | 700                                          | nan              |
| subj 47 | middle turbinate | 130                                  | 700                                          | nan              |
| subj 48 | middle turbinate | burst                                | 710                                          | nan              |
| subj 48 | middle turbinate | 2                                    | 520                                          | pinpricks        |
| subj 48 | middle turbinate | 10                                   | 245                                          | phosphenes       |

|         | <b>Location</b>  | <b>Frequency of stimulation (Hz)</b> | <b>Delivered current (<math>\mu</math>A)</b> | <b>Sensation</b> |
|---------|------------------|--------------------------------------|----------------------------------------------|------------------|
| subj 48 | middle turbinate | 70                                   | 480                                          | pinpricks        |
| subj 48 | middle turbinate | 90                                   | 450                                          | pinpricks        |
| subj 48 | middle turbinate | 130                                  | 450                                          | pinpricks        |
| subj 48 | middle turbinate | 180                                  | 450                                          | pinpricks        |
| subj 49 | middle turbinate | 2                                    | 510                                          | nan              |
| subj 49 | middle turbinate | 10                                   | 260                                          | phosphenes       |
| subj 49 | middle turbinate | 70                                   | 500                                          | nan              |
| subj 49 | middle turbinate | 90                                   | 510                                          | nan              |
| subj 49 | middle turbinate | 130                                  | 540                                          | nan              |
| subj 50 | middle turbinate | 2                                    | 380                                          | Tingling at ref  |
| subj 50 | middle turbinate | 10                                   | 130                                          | phosphenes       |
| subj 50 | middle turbinate | 70                                   | 330                                          | Tingling at ref  |
| subj 50 | middle turbinate | 90                                   | 280                                          | Tingling at ref  |
| subj 50 | middle turbinate | 130                                  | 400                                          | Tingling at ref  |
| subj 50 | middle turbinate | 180                                  | 400                                          | Tingling at ref  |
