# Supplementary figures and images for: From Nose to Brain: Un-Sensed Electrical Currents Applied in the Nose Alter Activity in Deep Brain Structures
Source: PubMed Central journal article supplement — Cereb Cortex. 2016 Oct 17;26(11):4180–91. doi: 10.1093/cercor/bhw222 (PMC5066827; doi:10.1093/cercor/bhw222), 2016-10-17

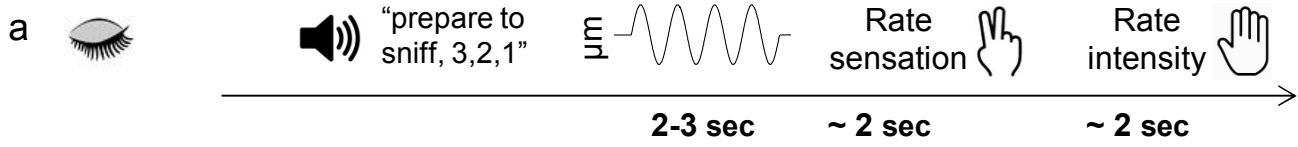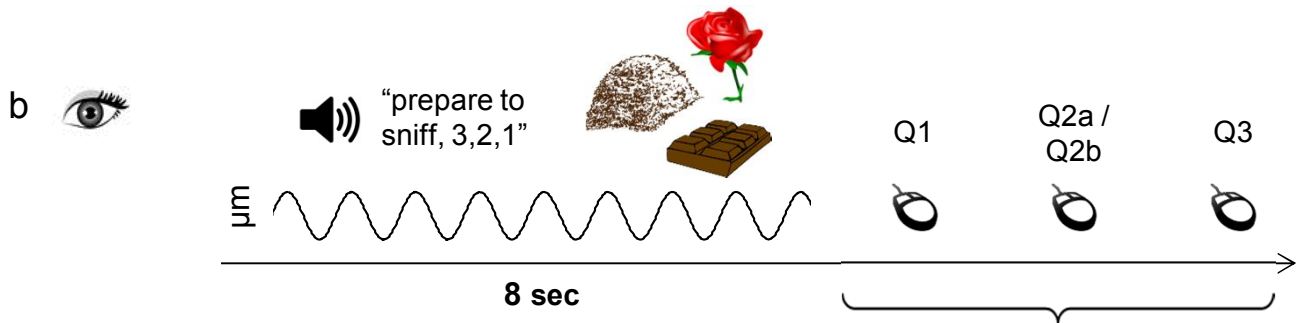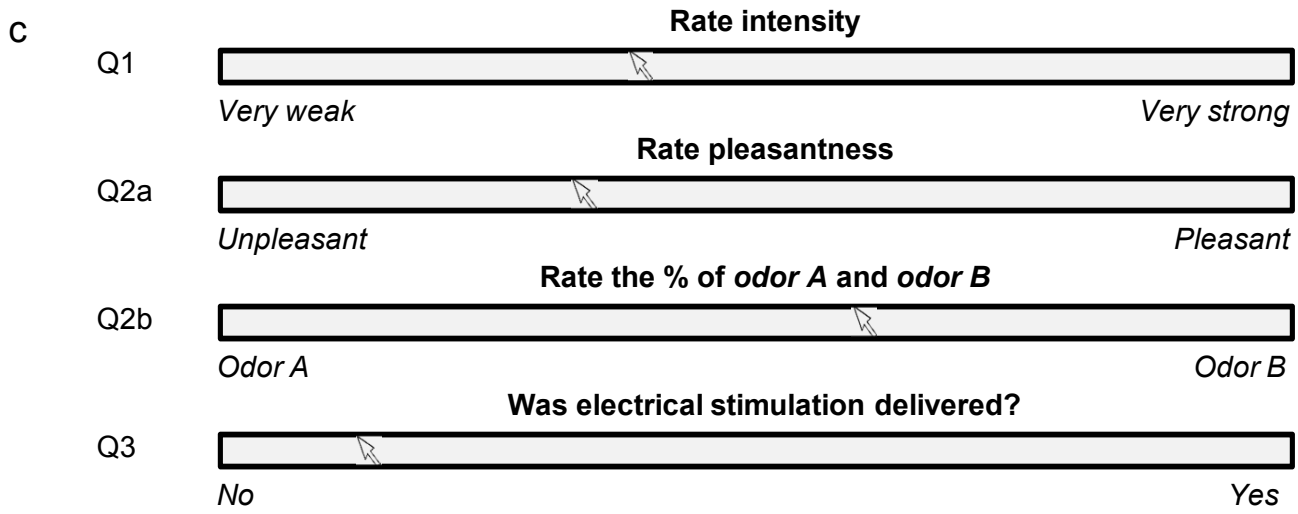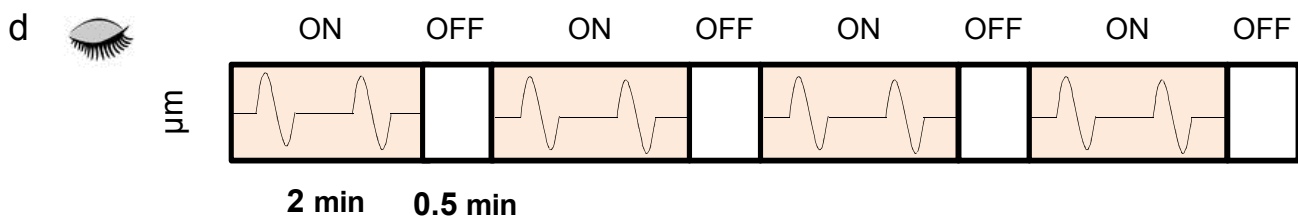

Supplement: supp_bhw222_WeissSuppFig1.pdf [file supp_bhw222_WeissSuppFig1.pdf]
